# Supplementary material for: Trends in the Phenology of Climber Roses under Changing Climate Conditions in the Mazovia Lowland in Central Europe
Source: MDPI journal article supplement (doi:10.3390/app12094259), 2022-04-22
Supplement: s1 [file s1]

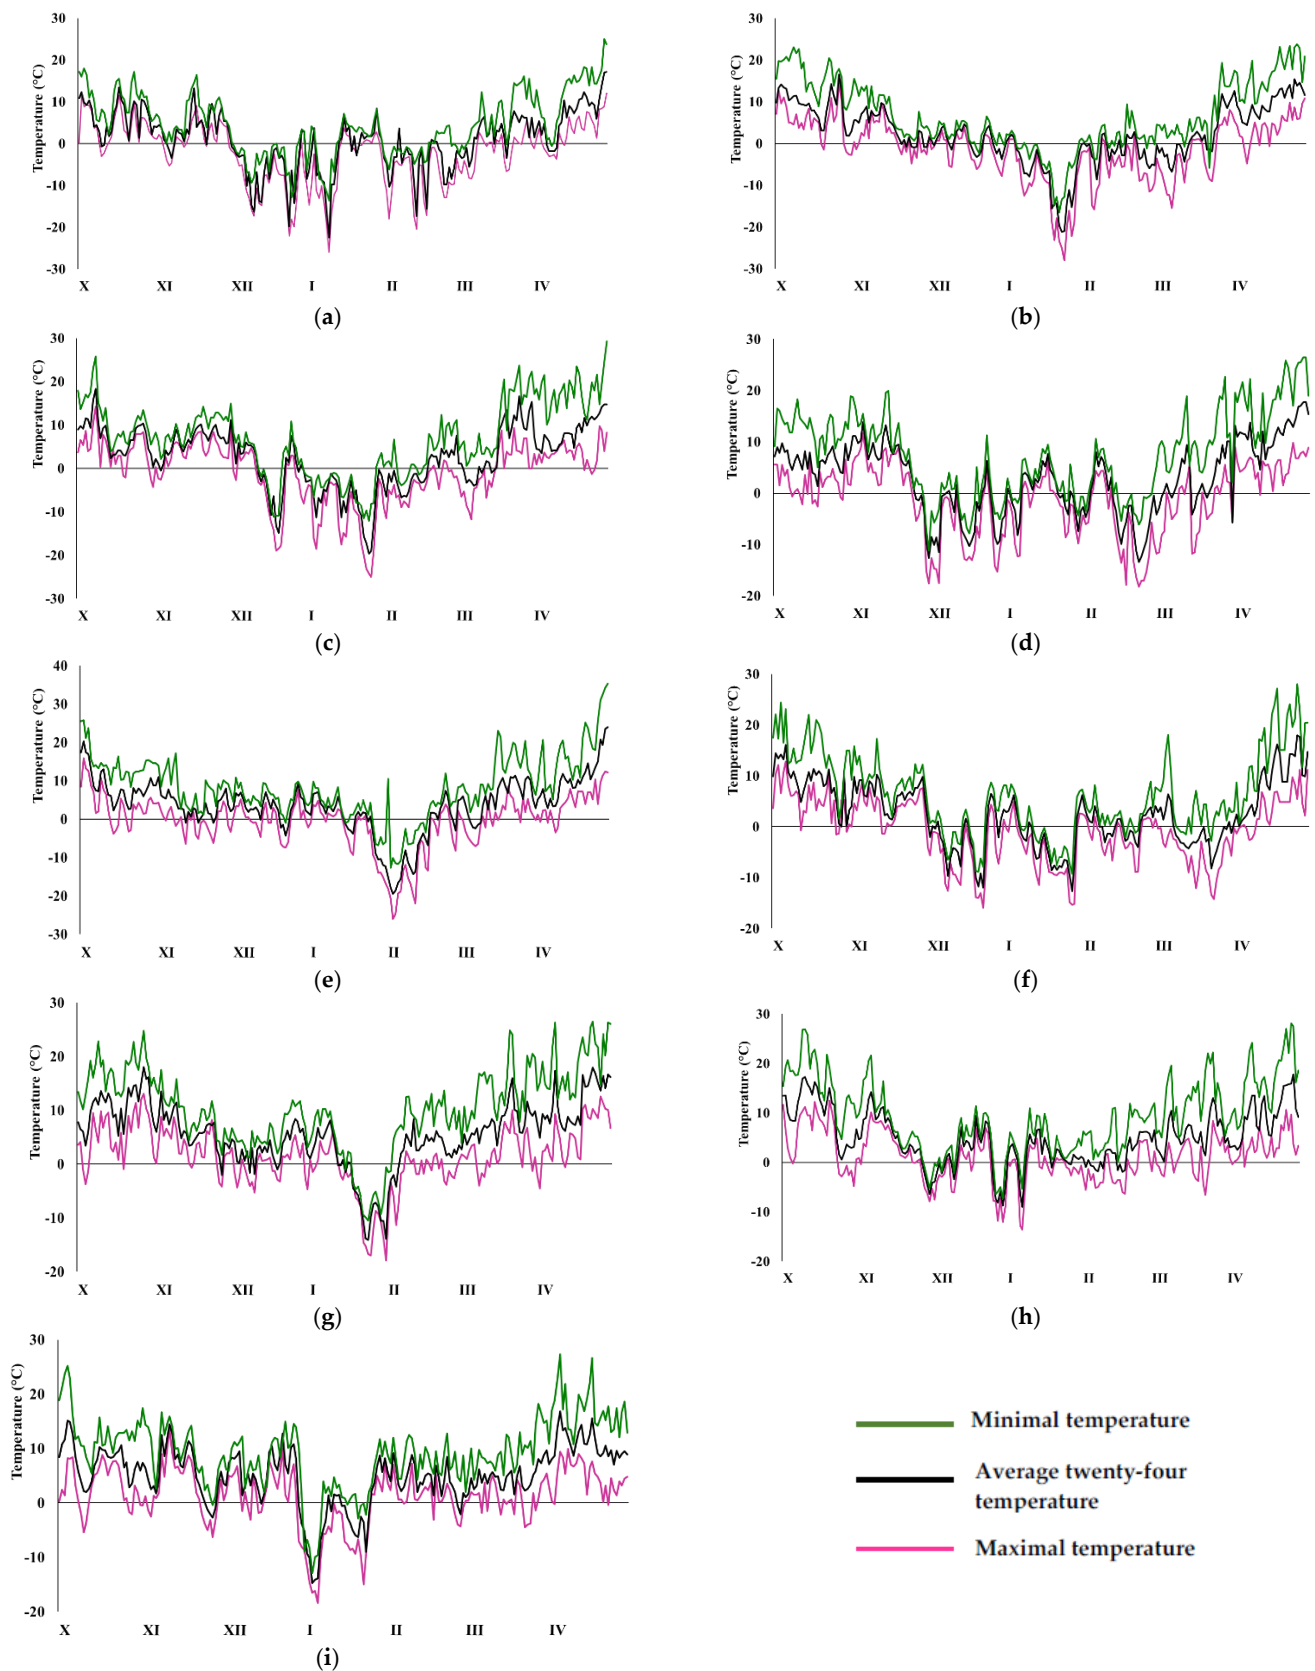

**Figure S1.** The minimal (purple line), average twenty-four (black line) and maximal (green line) air temperature from October to April for the seasons: 2002/2003 (a), 2005/2006 (b) and 2009/2010 (c), 2010/2011 (d), 2011/2012 (e) and 2012/2013 (f), 2013/2014 (g), 2014/2015 (h), 2015/2016 (i) (Monder, 2021).
